# Supplementary material
Source: PubMed Central journal article supplement (PMC2666918)
Supplement: NIHMS62288-supplement-si20070105_123.pdf [file NIHMS62288-supplement-si20070105_123.pdf]

# Reversible Condensation of DNA using a Redox-Active Surfactant

Melissa E. Hays, Christopher M. Jewell, David M. Lynn\*, and Nicholas L. Abbott\*

*Department of Chemical and Biological Engineering, University of Wisconsin, 1415 Engineering Drive, Madison, WI 53706-1691*

## Supplemental Materials

### Electrochemical and Chemical Transformations DNA/FTMA Complexes

The current measured during the electrochemical oxidation of complexes of DNA and 30 $\mu$ M reduced FTMA is shown in Figure S1. We measured the current passed between the working and counter electrodes to decrease with time. This observation is consistent with oxidation of FTMA.<sup>1</sup> We also measured the optical absorbance spectra of the solutions before and after oxidation at wavelengths between 190nm and 800nm (Figure S2). For reference, Figure S2 shows the absorption spectra of samples prepared by mixing DNA with either reduced or oxidized FTMA at a final concentration of 30 $\mu$ M FTMA. The sample containing the oxidized FTMA was characterized by a peak in absorbance at 625nm, which was absent for reduced FTMA. When the reduced FTMA + DNA solution was oxidized electrochemically as described in the Methods section, the final solution also exhibited a peak at 625nm at a magnitude very similar to a sample prepared by mixing oxidized FTMA and DNA. When combining the data in Figure S1 and Figure S2, we concluded that the solution of DNA and 30 $\mu$ M reduced FTMA was fully oxidized after application of a potential of 400mV for 50 minutes.

We added ascorbic acid to a solution of oxidized FTMA and DNA (prepared by electrochemical oxidation of reduced FTMA when mixed with DNA). Inspection of the optical absorbance spectrum of this sample in Figure S2 reveals no peak at 625nm (as observed with oxidized FTMA) providing evidence that FTMA was reduced by ascorbic acid. When ascorbic acid was added to a solution of DNA mixed with oxidized FTMA, the peak at 625nm was also eliminated. As a control, we added ascorbic acid to a solution of DNA and to a solution of DNA in the presence of 30 $\mu$ M reduced FTMA (Figure S2 and Table S1). No change was observed in the absorbance spectra in the range of 500 – 800nm. We concluded that the oxidized FTMA was fully reduced by the ascorbic acid in the presence of DNA.

### **Influence of Oxidizing Potential on DNA**

To assess the potential influence that an oxidizing potential may cause to the conformation of DNA in solution, we applied a potential of 400mV for 1-1.5 hours to a solution of DNA in the absence of FTMA. Subsequent DLS measurements revealed no change in the ACF of the solution after the applied potential as compared to the ACF of the DNA without an applied potential. We then added reduced FTMA to the solution of DNA that was pre-exposed to an oxidizing potential to a final concentration of 30 $\mu$ M reduced FTMA and performed measurements of DLS. The addition of reduced FTMA led to shorter relaxation times, similar to the relaxation times present for a solution prepared by mixing DNA with reduced FTMA. We concluded that the applied potential did not interfere with the ability of FTMA to interact with DNA and cause a change in conformation. We also note that several past studies have reported that potentials of

greater than 1200mV are required to oxidize the base pairs of DNA.<sup>2-4</sup> The low potentials used in our experiment are unlikely to cause damage to DNA.

### References

- (1) Rosslee, C. A.; Khripin, C.; Foley, T. M. D.; Abbott, N. L. *AIChE Journal* **2004**, *50*, 708-714.
- (2) Ye, Y.; Ju, H. *Sensors* **2003**, *3*, 128-145.
- (3) Teijeiro, C.; Nejedly, K.; Palecek, E. *Journal of Biomolecular Structure & Dynamics* **1993**, *11*, 313-331.
- (4) Palecek, E.; Jelen, F.; Trnkova, L. *General Physiology and Biophysics* **1986**, *5*, 315-329.

**Tables**

Table S1. Absorbance measurements of 5 $\mu$ M DNA and 30 $\mu$ M FTMA complexes prepared by *in situ* electrochemical oxidation and subsequent chemical reduction by ascorbic acid. All absorbance measurements are reported relative to a sample containing 5 $\mu$ M DNA in 1mM Li<sub>2</sub>SO<sub>4</sub>.

| <b>Sample</b>                                                 | <b>Absorbance<br/>at 625nm<br/>(x1000)</b> |
|---------------------------------------------------------------|--------------------------------------------|
| DNA + reduced FTMA                                            | 0.53 $\pm$ 0.06                            |
| DNA + oxidized FTMA                                           | 8.36 $\pm$ 0.09                            |
| DNA + FTMA oxidized <i>in situ</i>                            | 8.29 $\pm$ 0.12                            |
| DNA + ascorbic acid                                           | -0.11 $\pm$ 0.07                           |
| DNA + oxidized FTMA + 30 $\mu$ M ascorbic acid                | 0.30 $\pm$ 0.07                            |
| DNA + reduced FTMA + 30 $\mu$ M ascorbic acid                 | 0.12 $\pm$ 0.08                            |
| DNA + FTMA oxidized <i>in situ</i> + 30 $\mu$ M ascorbic acid | 0.52 $\pm$ 0.08                            |

## Figures

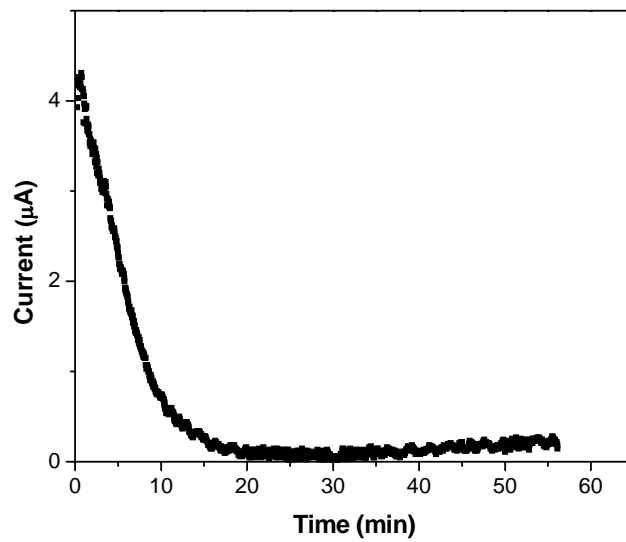

Figure S1. Oxidation of 5 $\mu$ M DNA and 30 $\mu$ M reduced FTMA using 400mV at room temperature.

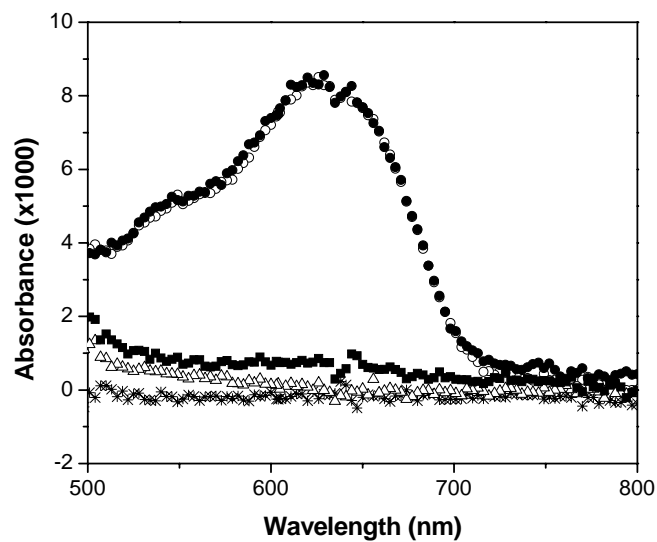

Figure S2. UV-visible spectrophotometry of 5 $\mu$ M DNA and 30 $\mu$ M FTMA. The symbols correspond to solutions of DNA mixed with oxidized FTMA (●), DNA mixed with reduced FTMA (■), complexes prepared by *in situ* oxidation of reduced FTMA DNA (○), complexes prepared by *in situ* oxidation of reduced FTMA and DNA followed by addition of L-ascorbic acid to a final concentration of 30 $\mu$ M ( $\Delta$ ), DNA without FTMA in the presence of 30 $\mu$ M ascorbic acid (\*).
